## 1 **EcOH: *In silico* serotyping of *E. coli* from short read data**

2  
3 Danielle J. Ingle<sup>1,2,3\*</sup>, Mary Valcanis<sup>4</sup>, Alex Kuzevski<sup>4</sup>, Marija Tauschek<sup>1</sup>, Michael Inouye<sup>3,5</sup>,  
4 Tim Stinear<sup>1</sup>, Myron M. Levine<sup>6</sup>, Roy M. Robins-Browne<sup>1,7</sup> and Kathryn E. Holt<sup>2,3\*</sup>  
5

6 <sup>1</sup> Department of Microbiology and Immunology, Peter Doherty Institute for Infection and  
7 Immunity, The University of Melbourne, Victoria, Australia

8 <sup>2</sup> Department of Biochemistry and Molecular Biology, Bio21 Molecular Science and  
9 Biotechnology Institute, The University of Melbourne, Victoria, Australia

10 <sup>3</sup> Centre for Systems Genomics, The University of Melbourne, Victoria, Australia

11 <sup>4</sup> Microbiological Diagnostic Unit Public Health Laboratory, Peter Doherty Institute for  
12 Infection and Immunity, The University of Melbourne, Victoria, Australia

13 <sup>5</sup> School of BioSciences, The University of Melbourne, Victoria, Australia

14 <sup>6</sup> Center for Vaccine Development, University of Maryland School of Medicine, Baltimore,  
15 MD, USA

16 <sup>7</sup> Murdoch Childrens Research Institute, Royal Children's Hospital, Victoria  
17

18 \*Corresponding author: [ingled@student.unimelb.edu.au](mailto:ingled@student.unimelb.edu.au), [r.browne@unimelb.edu.au](mailto:r.browne@unimelb.edu.au),  
19 [kholt@unimelb.edu.au](mailto:kholt@unimelb.edu.au)  
20

## 21 **Abstract**

22  
23  
24 The lipopolysaccharide (O) and flagellar (H) surface antigens of *Escherichia coli* are targets  
25 for serotyping that have traditionally been used to identify pathogenic lineages of *E. coli*. As  
26 serotyping has several limitations, public health reference laboratories are increasingly  
27 moving towards whole genome sequencing (WGS) for the rapid characterisation of bacterial  
28 isolates. Here we present a method to rapidly and accurately serotype *E. coli* isolates from  
29 raw, short read sequence data, leveraging the known genetic basis for the biosynthesis of O-  
30 and H-antigens. Our approach bypasses the need for *de novo* genome assembly by directly  
31 screening WGS reads against a curated database of alleles linked to known *E. coli* O-groups  
32 and H-types (the EcOH database) using the software package SRST2. We validated our  
33 approach by comparing *in silico* results with those obtained via serological phenotyping of  
34 197 enteropathogenic (EPEC) isolates. We also demonstrated the utility of our method to  
35 characterise enterotoxigenic *E. coli* (ETEC) and the uropathogenic *E. coli* (UPEC) epidemic  
36 clone ST131, and for *in silico* serotyping of foodborne outbreak-related isolates in the public  
37 GenomeTrakr database.  
38

## 39 **Introduction**

40  
41 Differentiation of isolates of *Escherichia coli* is commonly performed by serological typing  
42 (serotyping) of the highly polymorphic somatic- (O) and flagellar- (H) antigens (DebRoy *et*  
43 *al.*, 2011; Wang *et al.*, 2003). The O-antigen is an integral part of the lipopolysaccharide  
44 (LPS) in the outer membrane of Gram-negative bacteria, whilst the H-antigen projects

45 beyond the cell wall and provides cell motility (Li *et al.*, 2010; Wang *et al.*, 2003). Currently  
46 there are 182 *E. coli* O-groups and 53 H-types recognised by serotyping (Croxen *et al.*,  
47 2013; Iguchi *et al.*, 2014; Joensen *et al.*, 2015). Serotyping involves performing a series of  
48 agglutination reactions with panels of antisera, and is expensive in terms of both labour and  
49 reagent costs (Achtman *et al.*, 2012; Fratamico *et al.*, 2009). In addition, the interpretation of  
50 these assays is subjective and relies on antisera that vary in titre and specificity according to  
51 the source and integrity of the serum. Further, a significant proportion of *E. coli* isolates  
52 (approximately one quarter) are serologically 'untypeable' due to cross-reactivity or a lack of  
53 reaction with available antisera (DebRoy *et al.*, 2011). For these reasons there has been a  
54 shift away from serological phenotyping of *E. coli*, towards inference of O- and H- genotypes  
55 using molecular methods (Jenkins, 2015).

56

57 O-antigen biosynthesis in *E. coli* is encoded in gene clusters that are typically located  
58 between the chromosomal housekeeping genes *galF* and *gnd/ugd* (Iguchi *et al.*, 2014; Liu *et*  
59 *al.*, 1996). The genes required to synthesise this antigen fall into three classes: (i) sugar  
60 synthesis genes, (ii) glycosyl transferase genes, and (iii) O-antigen processing genes  
61 (Samuel & Reeves, 2003). Two distinct O-antigen pathways are known: (i) the Wzx/Wzy-  
62 dependent pathway, encoded by the *wzx* (O-antigen flippase) and *wzy* (O-antigen  
63 polymerase) genes, and (ii) the ABC transporter pathway, encoded by *wzm* and *wzt* (Feng *et*  
64 *al.*, 2004; Samuel & Reeves, 2003). In general, variation in these gene sequences correlates  
65 with structural variation in the carbohydrate residues that make up each O-antigen (DebRoy  
66 *et al.*, 2011; Wang *et al.*, 2003). Because of this, the sequences of these genes can be used  
67 for O-antigen genotyping (Joensen *et al.*, 2015; Mentzer *et al.*, 2014). Nevertheless,  
68 genotype-phenotype relationships for some O-groups are unexpectedly complex. For  
69 example, two distinct gene clusters are associated with the same O45 serotype (Plainvert *et*  
70 *al.*, 2007), whereas some distinct O-antigens are encoded by near-identical gene clusters  
71 (Iguchi *et al.*, 2014).

72

73 H-antigen specificity is determined by flagellin, which is the protein subunit of flagella. This  
74 protein is encoded by *fliC* in 43 of the 53 serologically defined H-types (Wang *et al.*, 2003).  
75 PCR detection of *fliC* alleles has been used for molecular H-typing for some time (Wang *et*  
76 *al.*, 2003). However, some *E. coli* isolates have an alternative flagellar phase, due to the  
77 presence of an additional flagellin gene (*flnaA*, *fliA*, *fmlA* or *flkA*), similar to those found in  
78 *Salmonella* species (Feng *et al.*, 2008; Ratiner, 1998; Ratiner *et al.*, 2010; Tominaga, 2004;  
79 Tominaga & Kutsukake, 2007).

80

81 As the cost of high-throughput short read DNA sequencing declines, public health  
82 laboratories are increasingly moving away from phenotyping and towards whole genome  
83 sequence (WGS) based typing of bacteria including *E. coli* (Joensen *et al.*, 2015; Kwong *et*  
84 *al.*, 2015). Given the strong genetic basis for O- and H-antigenic variation in *E. coli*, the  
85 availability of genome data provides a valuable opportunity to infer serotypes at little or no  
86 additional cost. Here we present a method to rapidly and accurately serotype *E. coli* isolates  
87 from raw, short read sequence data, by screening reads directly against a curated database  
88 of alleles linked to known *E. coli* O-groups and H-types (the EcOH database, presented  
89 here) using the software package SRST2 (Inouye *et al.*, 2014). The EcOH database can  
90 also be used to infer serotypes from assembled genome data using BLAST or other  
91 sequence comparison tools, which will become increasingly useful as long-read sequence  
92 data become more common. We validated our approach by comparing *in silico* predicted  
93 serotypes to those determined phenotypically in a public health reference laboratory, and  
94 demonstrated the utility of *in silico* serotyping to characterise more than 1,000 *E. coli* isolates  
95 including enteropathogenic *E. coli* (EPEC), enterotoxigenic *E. coli* (ETEC), the  
96 uropathogenic *E. coli* (UPEC) clone ST131 and foodborne outbreak-associated isolates of  
97 *E. coli* deposited in the public GenomeTrakr database.

98

## 99 **Methods**

100

### 101 ***Curation of the EcOH database***

102 The EcOH database of O- and H-type encoding sequences was initially constructed in 2014  
103 from publically available sequences identified in GenBank by reviewing the literature on the  
104 PCR detection of *E. coli* O- and H-types (DebRoy *et al.*, 2011; Ratiner *et al.*, 2010; Wang *et*  
105 *al.*, 2003). This was updated by a further review in May 2015 (Iguchi *et al.*, 2014; Joensen *et*  
106 *al.*, 2015). Twelve novel O loci identified in the present study were also included. The  
107 resulting EcOH database includes sequences of alleles for *wzm* and *wzt*, or *wzx* and *wzy*,  
108 covering 180 O-groups; and *fliC*, *fliA*, *fmlA*, *flkA* and *fliA* allele sequences covering all 53  
109 known H-types. Details of all sequences in the EcOH database are provided in **Table S1**.  
110 The EcOH database is available at <https://github.com/katholt/srst2>.

111

### 112 ***Publically available sequence data used in this study***

113 Details of the short read Illumina data used in this study are provided in **Table 1**. A total of  
114 41 complete *E. coli* genomes were downloaded from PATRIC (Wattam *et al.*, 2013), with the  
115 accession numbers given in **Table S2**. Serologically determined O-groups were identified in  
116 the GenBank entries or associated literature for 40 of these genomes (and H-types for 20)  
117 (**Table S2**). The Achtman multi-locus sequence typing (MLST) scheme for *E. coli* (Wirth *et*

118 *al.*, 2006), now hosted at Warwick University (<http://mlst.warwick.ac.uk/mlst/dbs/Ecoli>), was  
119 downloaded using the getmlst.py script included in the SRST2 package  
120 (<https://github.com/katholt/srst2>). An SRST2-formatted version of the ARG-ANNOT  
121 antimicrobial resistance gene database (Gupta *et al.*, 2013) was downloaded from  
122 <https://github.com/katholt/srst2>.

123

#### 124 **Assembly and BLAST analysis**

125 100 bp PE Illumina reads were generated previously for 197 EPEC isolates (Ingle *et al.*, in  
126 press) and assembled using Velvet and Velvet Optimiser (Zerbino & Birney, 2008). Reads  
127 and assemblies are available in the European Nucleotide Archive (ENA) under ERP001141  
128 (Ingle *et al.*, in press). Here, we generated alternative assemblies using SPAdes (v3)  
129 (Bankevich *et al.*, 2012) with error correction and kmer lengths of 21, 33, 55, 77 and 89. The  
130 resulting contigs were extended with the scaffolder SSPACE (Boetzer *et al.*, 2011); gaps  
131 within the scaffolds were closed using GapFiller (Boetzer & Pirovano, 2012) and then further  
132 extended with AlignGraph (Bao *et al.*, 2014).

133

134 Both sets of assemblies were screened against the EcOH database using BLAST+ (*blastn*).  
135 A genotype call was made where a hit was identified with  $\geq 90\%$  coverage of a query  
136 sequence at  $\geq 90\%$  nucleotide identity. Note that as the SPAdes assemblies yielded fewer  
137 genomes with BLAST+ hits to O-antigen loci, these assemblies were discarded and all  
138 results were reported as comparisons of SRST2 data to assembly-based analysis using the  
139 Velvet Optimiser assemblies. This makes the comparison as generous as possible towards  
140 the competing method of assembly-based analysis.

141

#### 142 **SRST2 analysis**

143 SRST2 was run with default parameter settings, such that a genotype call reflects detection  
144 of reads covering  $\geq 90\%$  of the length of a query locus at  $\geq 90\%$  nucleotide identity. Where  
145 multiple alleles of the same locus appears in the database, SRST2 reports the best-scoring  
146 allele as the genotype call (Inouye *et al.*, 2014). A confident genotype call is defined as one  
147 exceeding the minimum depth cut-offs (Inouye *et al.*, 2014). Here we used the SRST2  
148 default values of  $\geq 5x$  mean read depth across the query locus to define a confident call.

149

#### 150 **Phenotypic characterisation of 197 EPEC isolates**

151 Isolates were subcultured on Luria-Bertani agar and incubated overnight at 37°C before  
152 being submitted to the National *E. coli* Reference Laboratory at the Microbiological  
153 Diagnostic Unit Public Health Laboratory (MDU PHL) in Melbourne, Australia, for serotyping.

154 O- and H- serotyping utilised the standard tube agglutination tests, adapted for U-bottomed  
155 microtitre trays (Chandler & Bettelheim, 1974; Kauffmann, 1944).

156

### 157 **Characterisation of potential novel O-antigens**

158 Where an O-group was determined via serological testing of an isolate, but no *wzx/wzy* or  
159 *wzm/wzt* genes were detected in the corresponding isolate's genome, the *de novo* genome  
160 assembly was interrogated to identify potential novel O-antigen loci. For each such isolate  
161 the assembled contig containing the genes *galF* and *gnd*, which typically flank the O-antigen  
162 locus, was identified using BLAST and extracted using EMBOSS (Rice *et al.*, 2000). The  
163 intervening sequences were annotated with Prokka (v1.11) (Seemann, 2014), using  
164 translated protein sequences from the EcOH database as the preliminary annotation source.  
165 We then used ACT (Carver *et al.*, 2008) to visually compare the annotated sequences with  
166 full-length reference sequences for the corresponding O-group that had been identified by  
167 serology. Putative *wzx* and *wzy* alleles for these O-groups were identified based on (i) the  
168 annotation, (ii) sequence homology with the reference O-group sequences, and (iii) the  
169 presence of transmembrane domains identified using TMHMM (Krogh *et al.*, 2001). These  
170 putative *wzx* and *wzy* gene sequences were added to the EcOH database with the suffix  
171 'var1, var2', etc to differentiate them from the prototypical alleles (e.g. the novel *wzx* gene  
172 detected in isolates that were serologically phenotyped as O116 are labelled 'wzx-  
173 O116var1', whereas the prototypical O116 *wzx* gene is labelled *wzx*-O116, see **Table S1**).

174

### 175 **Analysis and visualisation of O- and H- antigen diversity and MLST data**

176 For the EPEC and ETEC pathotypes, population structure was determined by constructing  
177 neighbour-joining trees based on Hamming distances between MLST allele profiles inferred  
178 from the genomes using SRST2. O- and H-types were plotted against these trees using *R*  
179 (plotting code is available in the *plotSRST2data.R* script within the SRST2 package at  
180 <https://github.com/katholt/srst2>). Diversity analyses, including Simpson index calculations  
181 and rarefaction plots, were performed using the *vegan* package for R (Oksanen *et al.*, 2015).

182

### 183 **Analysis of ST131 UPEC**

184 Illumina reads from a total of 169 isolates (accession numbers in **Table 1**) were mapped to  
185 the ST131 reference genome, SE15 (accession AP009378) (Toh *et al.*, 2010) using the  
186 mapping-based pipeline RedDog (available at <https://github.com/katholt/RedDog>). Briefly,  
187 RedDog uses Bowtie2 (Langmead *et al.*, 2009) to map short reads to the reference genome  
188 then uses SAMtools (Li *et al.*, 2009) to call SNPs (Phred score  $\geq 30$ , read depth  $\geq 5x$ );  
189 consensus alleles at all SNP sites identified in the isolate collection are then extracted from

190 each read set using SAMtools (Li *et al.*, 2009) (Phred score  $\geq 20$  and unambiguous  
191 homozygous base call; otherwise allele call set to unknown '-').

192

193 The resulting SNPs were filtered to include only those located within common genes  
194 (defined as genes with  $\geq 95\%$  coverage in  $\geq 95\%$  of the ST131 genomes analysed), yielding a  
195 total of 38,213 SNPs. The resulting SNP alignment was used as input to infer a maximum  
196 likelihood (ML) tree using RAxML (yielding 100% bootstrap support for all major nodes). The  
197 phylogeny was outgroup-rooted using the group comprising four closely related ST95  
198 isolates (these had originally been identified as ST131 in PCR analysis for *rfb* and *pabB*  
199 genes, before MLST confirmed they were ST95 (Petty *et al.*, 2014)).

200

### 201 **Analysis of GenomeTrakr**

202 GenomeTrakr (NCBI BioProject: PRJNA183844) is a public repository of genome data from  
203 foodborne pathogens submitted by various laboratories including the US Food and Drug  
204 Administration and the Centers for Disease Control and Prevention. It includes raw Illumina  
205 reads and a kmer-based phylogeny of *E. coli* read sets, which is updated daily to incorporate  
206 newly submitted data. A subset of the most recently submitted read sets, together with the  
207 kmer tree, were downloaded from GenomeTrakr on 5 June, 2015. A subtree representing  
208 relationships between the 300 isolates was extracted from the full kmer tree, by removing all  
209 other tips from the tree using R packages *ape* (Paradis *et al.*, 2004) and *Geiger* (Harmon *et al.*, 2007).

211

## 212 **Results and Discussion**

213

214 To identify unique sequences encoding *E. coli* O- and H- antigens, we began by curating a  
215 database (named EcOH) of 551 unique sequences representing known O- and H-types of *E.*  
216 *coli*, incorporating data from Iguchi *et al.* 2014 and several reviews (see **Methods**). Of the  
217 182 currently recognised O-serogroups of *E. coli*, 180 corresponding genotypes were  
218 represented in the database by gene sequences for either *wzx* and *wzy*, or *wzm* and *wzt*.  
219 The two exceptions were O57 and O14, as isolates with these O-groups lack any of these  
220 genes and harbour only small O-antigen gene clusters, with no known polymerase or  
221 flippase genes, and only the housekeeping genes *galF*, *gnd* and *hisI* together with *ugd* and  
222 *wzz* which is not sufficient to delineate these O-groups. The EcOH database also includes  
223 sequences for all 53 known H-types, allowing for the detection of both *fliC* and non-*fliC*  
224 flagellin genes, and for the identification of isolates that may be able to undergo flagellum  
225 phase variation (Tominaga, 2004; Tominaga & Kutsukake, 2007).

226



227 As a preliminary validation of the EcOH database, we used it to screen 40 publically  
228 available *E. coli* genome assemblies that had reported O-groups. For 38 of these genomes  
229 the expected O-group (or O-cluster based on near-identical gene clusters (Iguchi *et al.*,  
230 2014)) was detected (**Table S2**). The two exceptions were *E. coli* isolates SE11 and SE15,  
231 which are reported in the literature as O152 and O150, respectively (Oshima *et al.*, 2008;  
232 Toh *et al.*, 2010). *In silico* analysis of these genomes identified *wzx* and *wzy* alleles for O16  
233 and O173, respectively, and no BLAST+ hits to the alleles corresponding to the reported  
234 serogroups O152 and O150. Reported H-types were available for 20 of the reference  
235 genomes and we identified the expected H-alleles in all of these (**Table S2**), including both  
236 *fliC* H4 and *fliA* H17 in strain p12, consistent with a previous report of dual flagellin loci in  
237 this isolate (Ratiner *et al.*, 2010).

238

### 239 **Comparison of serological phenotyping to *in silico* serotype prediction**

240 We compared *in silico* serotyping (i.e., O- and H-genotyping) to serological phenotyping of  
241 197 EPEC isolates. All isolates were serotyped by a national reference laboratory which  
242 yielded phenotypic identification of O-group for 144 isolates (73%; total 44 O-groups). The  
243 remaining 53 isolates were assessed either as O-rough (n=9, the isolates auto-agglutinated  
244 or were hyper-mucoid), or as O-non-typeable (n=44, agglutination did not occur with any  
245 antisera). H-types were phenotypically identified for 128 isolates (65% of those tested; 18  
246 different H-types). The remaining 69 isolates were identified as H- (n=67, indicating that the  
247 isolate was non-motile) or H rough (n=2, indicating non-specific agglutination with H-  
248 antisera).

249

250 The 197 isolates were previously subjected to whole genome sequencing using the Illumina  
251 HiSeq platform (Ingle *et al.*, 2015, in press). We compared two different strategies for *in silico*  
252 assignment of O- and H- types using the EcOH database: (i) typing direct from reads using  
253 SRST2, and (ii) *de novo* assembly (using Velvet Optimiser) followed by identification of  
254 alleles via BLAST+ (see **Methods**). Results are summarised in **Figure 1** with the full results  
255 reported in **Tables S3-S5**. SRST2 analysis yielded matching (i.e., same O-group) confident  
256 genotype calls at two O-determining loci (either *wzx* and *wzy*, or *wzm* and *wzt*) for 167  
257 isolates (85%), and at one O-determining locus for a further 15 isolates. Thus, a total of 182  
258 (93%) isolates were genotyped using SRST2, including 137/144 (95%) of those that were  
259 serologically typeable and 45/53 (85%) of those that were not (i.e., those that the reference  
260 laboratory identified as O-non-typeable or O-rough) (**Fig. 1(a)**). In comparison, BLAST+  
261 analysis of the Velvet Optimiser assemblies yielded full-length (>90% coverage) hits to  $\geq 1$  O-  
262 gene locus for 180 (91%) isolates, including 135/144 (94%) of serologically typeable isolates  
263 and 45/53 (85%) of non-typeables (**Fig. 1(c)**). Alternative assemblies generated using

264 SPAdes yielded fewer hits, with only 91/144 (64%) serologically typed isolates yielding full-  
265 length (>90% coverage) BLAST+ hits to any O-gene in the EcOH database. These  
266 assemblies were not analysed further.

267

268 Of the 15 isolates for which SRST2 analysis did not yield a serotype call, 7 isolates had  
269 serological O-groups but no high confidence calls for any *wzx/wzy* or *wzm/wzt* genes  
270 (serologically typed as O2 [n=3], O103 [n=1], O108 [n=1], O124 [n=1] or O153 [n=1]). For 6  
271 of 7 of these isolates, no O-antigen genes were detected in the assemblies either; for one  
272 isolate (serologically O103), SRST2 yielded a low-confidence call of O111, while assembly  
273 analysis detected O103 *wzx* and *wzy* alleles (**Table S3**). The remaining 8 isolates had no  
274 serotype detected via phenotypic or genotypic assays.

275

276 Of the 144 isolates that yielded a serological O-phenotype, genotyping based on confident  
277 SRST2 calls at  $\geq 1$  O-gene locus matched the serologically identified O-group for 121  
278 isolates (84%), a different O-group for 16 isolates (11%; 15/16 with matching calls for both O  
279 loci) and no result for 7 isolates (5%) (**Table S3**). Of the 15 isolates for which SRST2 calls  
280 agreed at the two O loci but did not match the serological phenotype, assembly analysis  
281 identified the same O-group as SRST2 in 14/15 cases, and the serological O-type in 1/15  
282 cases. There was only one isolate for which assembly-based analysis identified the same O-  
283 group as phenotyping when SRST2 had no result, and there were also two cases where  
284 SRST2 analysis identified the serological O-group and BLAST+ did not.

285

286 The possible reasons for mismatches between O-antigen phenotype and genotype include  
287 multiple genetic variants manifesting in the same phenotype (for example O45, see  
288 (Plainvert *et al.*, 2007)) and/or atypical genetic variation such as multi-copy genes or novel  
289 genes. To explore these possibilities we manually inspected the genome assemblies of  
290 isolates yielding conflicting genotype/phenotype calls and identified twelve novel O-antigen  
291 loci, which were added to the EcOH database with the suffix 'var1, var2' etc., to differentiate  
292 them from prototypical alleles. (**Fig. S1**). For example, three isolates phenotyped as O116 or  
293 O33-related, had detectable *wzx* O116 genes but no *wzy* genes. Interestingly, the *wzx*  
294 alleles were detected at high depth (~100x) and were highly divergent from the reference  
295 O116 *wzx* allele (~10% nucleotide divergence, the maximum limit of detection we used for  
296 genotyping). We hypothesised that these isolates may carry *wzy* genes that are genetically  
297 distant from the prototypical alleles that were included in our database, but which  
298 nonetheless result in similar phenotypic agglutination patterns to isolates carrying more  
299 prototypical genes. Investigation of the corresponding genome assemblies revealed a novel  
300 O-antigen locus, including novel *wzx* and *wzy* variants that were 10% and 40% divergent,



301 respectively, from the prototypical O116 gene sequences (**Fig. S1(a)**). The novel *wzx* and  
302 *wzy* sequences were labelled O116var1 and added to the EcOH database to facilitate  
303 identification of this novel type in future. In the genomes of four isolates genotyped as O8  
304 but phenotyped as O153 (**Table S3**), we confirmed the presence of O8 *wzx* and *wzy* alleles,  
305 but also identified a putative *wzx* homolog (with 76% identity to O83) outside the O-antigen  
306 region which, if expressed, could potentially alter the O-antigen phenotype (**Fig. S1(b)**).  
307 Interestingly, an isolate which displayed the O153 phenotype but had no O-locus hits in the  
308 EcOH database, also had two putative novel *wzx* genes (53% nucleotide similarity to O83  
309 and 57% to O170, respectively), one of which was similar to the additional *wzx* gene  
310 identified in the genomes of the O153 phenotype/O8 genotype isolates (**Fig. S1(b)**).

311  
312 H-typing using the EcOH database yielded similar results to O-typing. SRST2 analysis  
313 returned 127 confident calls that matched the phenotype in 119 of 128 (93%) of the  
314 serologically H-typed isolates, and gave confident genotype calls in 67 of 69 (97%) non-  
315 motile (serologically H-) isolates (**Fig. 1(b)**, **Tables S4-5**). In contrast, assembly analysis  
316 identified the expected genes in only 112/128 (88%) of serologically H-typed isolates and  
317 59/69 (86%) of non-motile isolates (**Fig. 1(d)**, **Tables S4-5**). The high rate of genotype calls  
318 amongst phenotypically H-non-motile isolates is likely due to a lack of flagellin expression  
319 during serotyping, which does not affect genotyping. Only two isolates had no flagellin genes  
320 detected from the sequence data. These were non-motile and may be the only isolates that  
321 genuinely lack the ability to express flagella.

322

### 323 ***Applications of rapid in silico serotyping and multi-locus sequence typing of E. coli***

324 The data above show that the use of SRST2 and the EcOH database to type raw Illumina  
325 read sets can provide rapid *in silico* serotyping, that outperforms assembly-dependent  
326 analysis (especially for H-typing) and is largely predictive of results obtained from serological  
327 typing while yielding fewer 'untypeable' results. In addition to the EcOH database, other  
328 databases, such as those used for multi-locus sequence typing (MLST) and antibiotic  
329 resistance gene profiles, can be interrogated using SRST2 (Inouye *et al.*, 2014), with a  
330 single SRST2 analysis returning MLST, serotype and antimicrobial resistance gene results in  
331 a few minutes (approximately 5-10 minutes for paired Illumina data at mean read depth 50-  
332 100x, see (Inouye *et al.*, 2014)). We therefore sought to demonstrate the utility of this  
333 approach for the rapid characterisation of *E. coli* genomes, including serotyping, MLST and  
334 antibiotic resistance gene profiling, in a variety of contexts including the investigation of  
335 EPEC and ETEC pathotype populations, the epidemic UPEC clone ST131, and isolates  
336 associated with foodborne outbreaks.

337

338 SRST2 analysis of the 197 EPEC plus 360 recently sequenced ETEC isolates (Mentzer *et*  
339 *al.*, 2014) highlighted that both pathotypes comprise a diversity of phylogenetic lineages and  
340 serotypes (**Fig. 2, Fig. S2**). A total of 46 O- and 20 H-types amongst the EPEC isolates; and  
341 54 O- and 31 H-types amongst the ETEC isolates (**Fig. 2, Fig. S2**). These analyses suggest  
342 that H-types are more stably maintained within *E. coli* clones than are O-groups (**Fig. 3**),  
343 consistent with observations of serological diversity in *Salmonella enterica* (Achtman *et al.*,  
344 2012). Interestingly, some MLST sequence types (STs) showed greater evidence of O-group  
345 diversity than others (**Figs. 2-3, Fig S2**), particularly ST29 and ST517 (EPEC); ST155,  
346 ST173 and ST23 (ETEC); and ST10 (both EPEC and ETEC). ST10 was frequent amongst  
347 both EPEC and ETEC and displayed high O-group diversity in both pathotypes (Simpson  
348 index = 0.62 in EPEC, 0.84 in ETEC; see **Fig. 3**). Interestingly, all ST10 EPEC carried H40  
349 flagella, but ST10 ETEC had 8 different H-types (Simpson index = 0.79; see **Fig. 3**). This  
350 high diversity within ST10 is consistent with the fact that it was one of the first *E. coli*  
351 lineages identified as harbouring multiple pathotypes as well as commensal strains (Mentzer  
352 *et al.*, 2014; Wirth *et al.*, 2006).

353

354 Next we used SRST2 and the EcOH database to analyse Illumina read sets for 169 UPEC  
355 isolates previously reported as belonging to the epidemic UPEC clone ST131 (Petty *et al.*,  
356 2014; Price *et al.*, 2013) (**Fig. 4**). Most isolates were confirmed as ST131, although 6 were  
357 single locus variants of ST131, including four belonging to ST95 (consistent with the original  
358 report on these genomes (Petty *et al.*, 2014)). *In silico* serotyping identified the majority of  
359 isolates (90%) as O25:H4, which is the reported O-group for this epidemic clone (Nicolas-  
360 Chanoine *et al.*, 2008). However, we also identified 14 isolates (8%) as O16:H5; these  
361 clustered together tightly in the core genome phylogeny, indicating they represent a sub-  
362 clone of ST131 in which a change of serotype has occurred (**Fig. 4**). The O16:H5 sub-clone  
363 carried fewer resistance genes than other ST131 genomes and corresponds to ST131 Clade  
364 A, which has been identified as an ancestral sub-lineage of ST131 that is distinct from the  
365 sub-lineage which is now globally disseminated (Petty *et al.*, 2014). O-antigen variation  
366 within ST131 was detected in the original genome reports (Petty *et al.*, 2014; Price *et al.*,  
367 2013), but was not explored in detail. Our data highlight the utility of *in silico* serotyping to  
368 illuminate on-going microevolution in important epidemic clones of *E. coli*, including change  
369 of serotype, which could confound serological identification of outbreak-related isolates.

370

371 Finally, we performed *in silico* serotyping of 300 foodborne outbreak-associated *E. coli*  
372 genomes recently deposited by public health laboratories into the GenomeTrakr project  
373 (NCBI BioProject accession: PRJNA183844). **Figure 5** shows our *in silico* serotyping results  
374 overlaid on the GenomeTrakr kmer-based tree. Environmental isolates displayed a diversity

375 of ST, O- and H-types, whereas most clinical isolates belonged to one of six clonal lineages,  
376 each characterised by a specific serotype (**Fig. 5**). The predominant lineage amongst these  
377 recently-deposited isolates was the well characterised enterohaemorrhagic *E. coli* (EHEC)  
378 lineage ST11, O157:H7. Other lineages included ST16 O111:H8, ST655 O121:H19, and  
379 ST232 O145:H- (in which no serotype variation was detected), as well as clonal complexes  
380 (CC) CC21 O26:H11 and CC17 O103:H2 (both of which displayed some serotype variation,  
381 see **Fig. 5**). For 227 isolates (76%), matching confident calls were obtained for both O-  
382 antigen genes, whilst 272 isolates (91%) had a confident call for at least one allele. In most  
383 cases where a low-confidence O-antigen genotype call was made (due to low read depth),  
384 the call was for O157 alleles; the position of these genomes within the ST11 O157:H7  
385 lineage of the kmer tree suggests that these low-confidence calls of these genomes are  
386 likely to be correct. Only 7 isolates (2%) yielded no genotype calls for the H-locus, indicating  
387 they are likely to be non-motile. These data demonstrate the utility of our method for *in silico*  
388 serotype prediction of *E. coli* sequenced for the investigation of foodborne outbreaks or other  
389 purposes.

390

## 391 **Conclusion**

392

393 This study has demonstrated that *E. coli* O- and H-genotypes can be rapidly and accurately  
394 extracted from whole genome data using the free SRST2 software and a new publicly  
395 available database, EcOH. The method improves on both (i) serological phenotyping, which  
396 is resource intensive in terms of time, labour and reagent costs, and fails to type up to one  
397 third of *E. coli* isolates, and (ii) assembly-based approaches for *in silico* genotyping of  
398 Illumina data, particularly for H-typing, which are more computationally expensive and are  
399 highly dependent on the quality of the sequence data. Importantly, since SRST2 works on  
400 raw reads and can readily be used to extract other useful genotyping information in addition  
401 to serotype, including MLST, antimicrobial resistance and virulence genes (Inouye *et al.*,  
402 2014), it lends itself to integration with robust assembly-free pathogen genome  
403 characterisation pipelines. Our data demonstrate that this approach can be used to readily  
404 infer serotypes from genome data currently being produced by GenomeTrakr and other  
405 public health networks as part of routine investigation of foodborne *E. coli* outbreaks. This  
406 could be useful in identifying the emergence of novel serotypes within outbreak clades that  
407 may signal a shift in the pathogen population during its dissemination (as we identified in  
408 ST131 UPEC), and importantly will provide backwards compatibility with the wealth of  
409 serotype data that is currently available from historical outbreak investigations.

410

411

## 412 Acknowledgements

413  
414 This work was supported by the Australia NHMRC (Project Grants #1043830 to KEH,  
415 #1009296 and #1067428 to RRB; Fellowship #1061409 to KEH; Fellowship #1061435 to MI  
416 (co-funded by the Australian Heart Foundation Career Development Fellowship)); the Bill &  
417 Melinda Gates Foundation (Grant #38874 to MML); and the Victorian Life Sciences  
418 Computation Initiative (VLSCI) (Grant #VR0082). We thank Gordon Dougan and the  
419 sequencing teams at the Wellcome Trust Sanger Institute for sequencing the EPEC isolate  
420 collection.

421

## 422 Abbreviations

423

424 CC clonal complex  
425 EHEC enterohaemorrhagic *Escherichia coli*  
426 EPEC enteropathogenic *Escherichia coli*  
427 ETEC enterotoxigenic *Escherichia coli*  
428 ML Maximum Likelihood  
429 MLST multi-locus sequence typing  
430 SNP single nucleotide polymorphism  
431 UPEC uropathogenic *Escherichia coli*  
432

## 433 References

434

435 **Achtman, M., Wain, J., Weill, F.-X., Nair, S., Zhou, Z., Sangal, V., Krauland, M. G., Hale,**  
436 **J. L., Harbottle, H. & other authors. (2012).** Multilocus Sequence Typing as a  
437 Replacement for Serotyping in *Salmonella enterica*. *PLoS Pathog* **8**, e1002776–19.  
438 **Bankevich, A., Nurk, S., Antipov, D., Gurevich, A. A., Dvorkin, M., Kulikov, A. S., Lesin,**  
439 **V. M., Nikolenko, S. I., Pham, S. & other authors. (2012).** SPAdes: A New Genome  
440 Assembly Algorithm and Its Applications to Single-Cell Sequencing. *Journal of*  
441 *Computational Biology* **19**, 455–477.  
442 **Bao, E., Jiang, T. & Girke, T. (2014).** AlignGraph: algorithm for secondary de novo genome  
443 assembly guided by closely related references. *Bioinformatics* **30**, i319–i328.  
444 **Boetzer, M., Henkel, C. V., Jansen, H. J., Butler, D. & Pirovano, W. (2011).** Scaffolding  
445 pre-assembled contigs using SSPACE. *Bioinformatics* **27**, 578–579.  
446 **Boetzer, M. & Pirovano, W. (2012).** Toward almost closed genomes with GapFiller.  
447 *Genome Biol* **13**, R56.  
448 **Carver, T., Berriman, M., Tivey, A., Patel, C., Bohme, U., Barrell, B. G., Parkhill, J. &**  
449 **Rajandream, M. A. (2008).** Artemis and ACT: viewing, annotating and comparing  
450 sequences stored in a relational database. *Bioinformatics* **24**, 2672–2676.  
451 **Chandler, M. E. & Bettelheim, K. A. (1974).** A rapid method of identifying *Escherichia coli*  
452 H antigens. *Zentralblatt für Bakteriologie, Parasitenkunde, Infektionskrankheiten und*  
453 *Hygiene Abt, Originale* **229**, 74–79.  
454 **Croxen, M. A., Law, R. J., Scholz, R., Keeney, K. M., Wlodarska, M. & Finlay, B. B.**  
455 **(2013).** Recent advances in understanding enteric pathogenic *Escherichia coli*. *Clin*  
456 *Microbiol Rev* **26**, 822–880.  
457 **DebRoy, C., Roberts, E. & Fratamico, P. M. (2011).** Detection of O antigens in *Escherichia*  
458 *coli*. *Anim Health Res Rev* **12**, 169–185.  
459 **Feng, L., Liu, B., Liu, Y., Ratiner, Y. A., Hu, B., Li, D., Zong, X., Xiong, W. & Wang, L.**  
460 **(2008).** A genomic islet mediates flagellar phase variation in *Escherichia coli* strains

- 461 carrying the flagellin-specifying locus *flk*. *J Bacteriol* **190**, 4470–4477.
- 462 **Feng, L., Senchenkova, S. N., Yang, J., Shashkov, A. S., Tao, J., Guo, H., Cheng, J.,**  
463 **Ren, Y., Knirel, Y. A. & other authors. (2004).** Synthesis of the heteropolysaccharide  
464 O Antigen of *Escherichia coli* O52 requires an ABC transporter: structural and genetic  
465 evidence. *J Bacteriol* **186**, 4510–4519.
- 466 **Fratamico, P. M., DebRoy, C., Miyamoto, T. & Liu, Y. (2009).** PCR detection of  
467 enterohemorrhagic *Escherichia coli* O145 in food by targeting genes in the *E. coli* O145  
468 O-antigen gene cluster and the Shiga Toxin 1 and Shiga Toxin 2 genes. *Foodborne*  
469 *Pathogens and Disease* **6**, 605–611.
- 470 **Gupta, S. K., Padmanabhan, B. R., Diene, S. M., Lopez-Rojas, R., Kempf, M., Landraud,**  
471 **L. & Rolain, J. M. (2013).** ARG-ANNOT, a new bioinformatic tool to discover antibiotic  
472 resistance genes in bacterial genomes. *Antimicrobial Agents and Chemotherapy* **58**,  
473 212–220.
- 474 **Harmon, L. J., Weir, J. T., Brock, C. D., Glor, R. E. & Challenger, W. (2007).** GEIGER:  
475 investigating evolutionary radiations. *Bioinformatics* **24**, 129–131.
- 476 **Iguchi, A., Iyoda, S., Kikuchi, T., Ogura, Y., Katsura, K., Ohnishi, M., Hayashi, T. &**  
477 **Thomson, N. R. (2014).** A complete view of the genetic diversity of the *Escherichia coli*  
478 O-antigen biosynthesis gene cluster. *DNA Res.*
- 479 **Ingle, D.J., Tauschek, M., Edwards, D.J., Hocking, D.M., Pickard, D.J., Azzopardi, K.I.,**  
480 **Amarasena, T., Bennett-Wood, V., Pearson, J.S., & other authors.** Evolution of  
481 atypical enteropathogenic *E. coli* by repeated acquisition of LEE pathogenicity island  
482 variants *Nat Micro* In press
- 483 **Inouye, M., Dashnow, H., Raven, L., Schultz, M. B., Pope, B. J., Tomita, T., Zobel, J. &**  
484 **Holt, K. E. (2014).** SRST2: Rapid genomic surveillance for public health and hospital  
485 microbiology labs. *Genome Med* **6**, 1–16.
- 486 **Jenkins, C. (2015).** Whole-Genome sequencing data for serotyping *Escherichia coli* - It's  
487 time for a change! *J Clin Microbiol* **53**, 2402–2403.
- 488 **Joensen, K. G., Tetzschner, A. M. M., Iguchi, A., Aarestrup, F. M. & Scheutz, F. (2015).**  
489 Rapid and easy *in silico* serotyping of *Escherichia coli* using whole genome sequencing  
490 (WGS) data. *J Clin Microbiol* **2410–2426**.
- 491 **Kauffmann, F. (1944).** The basis of O Antigen Serotyping is the standard tube agglutination  
492 tests adapted to use U-bottomed microtitre trays. *Microbiologica Scandinavia* **21**, 20–40.
- 493 **Krogh, A., Larsson, B., Heijne, von, G. & Sonnhammer, E. L. L. (2001).** Predicting  
494 transmembrane protein topology with a hidden markov model: application to complete  
495 genomes. *J of Mol Biol* **305**, 567–580.
- 496 **Kwong, J. C., McCallum, N., Sintchenko, V. & Howden, B. P. (2015).** Whole genome  
497 sequencing in clinical and public health microbiology. *Pathology* **47**, 199–210.
- 498 **Langmead, B., Trapnell, C., Pop, M. & Salzberg, S. L. (2009).** Ultrafast and memory-  
499 efficient alignment of short DNA sequences to the human genome. *Genome Biol* **10**,  
500 R25.
- 501 **Li, D., Bin Liu, Chen, M., Guo, D., Guo, X., Liu, F., Feng, L. & Wang, L. (2010).** A  
502 multiplex PCR method to detect 14 *Escherichia coli* serogroups associated with urinary  
503 tract infections. *Journal of Microbiological Methods* **82**, 71–77.
- 504 **Li, H., Handsaker, B., Wysoker, A., Fennell, T., Ruan, J., Homer, N., Marth, G.,**  
505 **Abecasis, G., Durbin, R. 1000 Genome Project Data Processing Subgroup. (2009).**  
506 The Sequence Alignment/Map format and SAMtools. *Bioinformatics* **25**, 2078–2079.
- 507 **Liu, D., Cole, R. A. & Reeves, P. R. (1996).** An O-antigen processing function for  
508 Wzx(RfbX): a promising candidate for O-unit flippase. *J Bacteriol* **178**, 2102–2107.
- 509 **Mentzer, von, A., Connor, T. R., Wieler, L. H., Semmler, T., Iguchi, A., Thomson, N. R.,**  
510 **Rasko, D. A., Joffre, E., Corander, J. & other authors. (2014).** Identification of  
511 enterotoxigenic *Escherichia coli* (ETEC) clades with long-term global distribution. *Nat*  
512 *Genet* **46**, 1321–1326.
- 513 **Nicolas-Chanoine, M.-H., Blanco, J., Leflon-Guibout, V., Demarty, R., Alonso, M. P.,**  
514 **Canica, M. M., Park, Y.-J., Lavigne, J.-P., Pitout, J. & Johnson, J. R. (2008).**  
515 Intercontinental emergence of *Escherichia coli* clone O25:H4-ST131 producing CTX-M-



- 516 15. *J Antimicrob Chemother* **61**, 273–281.
- 517 Oksanen, J., Blanchet, F. G., Kindt, R., Legendre, P., Minchin, P. R., OHara, R. B.,  
518 Simpson, G. L., Solymos, P., Stevens, M. H. H. & Wagner, H. (2015). *vegan*:  
519 *Community Ecology Package*.
- 520 Oshima, K., Toh, H., Ogura, Y., Sasamoto, H., Morita, H., Park, S. H., Ooka, T., Iyoda,  
521 S., Taylor, T. D. & other authors. (2008). Complete genome sequence and  
522 comparative analysis of the wild-type commensal *Escherichia coli* strain SE11 isolated  
523 from a healthy adult. *DNA Res* **15**, 375–386.
- 524 Paradis, E., Claude, J. & Strimmer, K. (2004). APE: Analyses of Phylogenetics and  
525 Evolution in R language. *Bioinformatics* **20**, 289–290. Oxford University Press.
- 526 Petty, N. K., Ben Zakour, N. L., Stanton-Cook, M., Skippington, E., Totsika, M., Forde,  
527 B. M., Phan, M. D., Gomes Moriel, D., Peters, K. M. & other authors. (2014). Global  
528 dissemination of a multidrug resistant *Escherichia coli* clone. *Proc Natl Acad Sci USA*  
529 **111**, 5694–5699.
- 530 Plainvert, C., Bidet, P., Peigne, C., Barbe, V., Medigue, C., Denamur, E., Bingen, E. &  
531 Bonacorsi, S. (2007). A new O-antigen gene cluster has a key role in the virulence of  
532 the *Escherichia coli* Meningitis clone O45:K1:H7. *J Bacteriol* **189**, 8528–8536.
- 533 Price, L. B., Johnson, J. R., Aziz, M., Clabots, C., Johnston, B., Tchesnokova, V.,  
534 Nordstrom, L., Billig, M., Chattopadhyay, S. & other authors. (2013). The epidemic  
535 of Extended-Spectrum- $\beta$ -Lactamase-Producing *Escherichia coli* ST131 is driven by a  
536 single highly pathogenic subclone, H30-Rx. *mBio* **4**, 1–10.
- 537 Ratiner, Y. A. (1998). New Flagellin-Specifying Genes in some *Escherichia coli* strains. *J*  
538 *Bacteriol* **180**, 979–984.
- 539 Ratiner, Y. A., Sihvonen, L. M., Liu, Y., Wang, L. & Siitonen, A. (2010). Alteration of  
540 flagellar phenotype of *Escherichia coli* strain P12b, the standard type strain for flagellar  
541 antigen H17, possessing a new non-*fliC* flagellin gene *flnA*, and possible loss of original  
542 flagellar phenotype and genotype in the course of subculturing through semisolid media.  
543 *Arch Microbiol* **192**, 267–278.
- 544 Rice, P., Longden, I. & Bleasby, A. (2000). EMBOSS: The European Molecular Biology  
545 Open Software Suite. *Trends Genet* **16**, 276–277.
- 546 Samuel, G. & Reeves, P. (2003). Biosynthesis of O-antigens: genes and pathways involved  
547 in nucleotide sugar precursor synthesis and O-antigen assembly. *Carbohydrate*  
548 *Research* **338**, 2503–2519.
- 549 Seemann, T. (2014). Prokka: rapid prokaryotic genome annotation. *Bioinformatics* **30**,  
550 2068–2069.
- 551 Toh, H., Oshima, K., Toyoda, A., Ogura, Y., Ooka, T., Sasamoto, H., Park, S. H., Iyoda,  
552 S., Kurokawa, K. & other authors. (2010). Complete Genome Sequence of the Wild-  
553 Type Commensal *Escherichia coli* Strain SE15, Belonging to Phylogenetic Group B2. *J*  
554 *Bacteriol* **192**, 1165–1166.
- 555 Tominaga, A. (2004). Characterization of six flagellin genes in the H3, H53 and H54  
556 standard strains of *Escherichia coli*. *Genes Genet Syst* **79**, 1–8.
- 557 Tominaga, A. & Kutsukake, K. (2007). Expressed and cryptic flagellin genes in the H44  
558 and H55 type strains of *Escherichia coli*. *Genes Genet Syst* **82**, 1–8.
- 559 Wang, L., Rothmund, D., Curd, H. & Reeves, P. R. (2003). Species-wide variation in the  
560 *Escherichia coli* flagellin (H-antigen) gene. *J Bacteriol* **185**, 2936–2943.
- 561 Wattam, A. R., Abraham, D., Dalay, O., Disz, T. L., Driscoll, T., Gabbard, J. L., Gillespie,  
562 J. J., Gough, R., Hix, D. & other authors. (2013). PATRIC, the bacterial bioinformatics  
563 database and analysis resource. *Nucleic Acids Res* **42**, D581–D591.
- 564 Wirth, T., Falush, D., Lan, R., Colles, F., Mensa, P., Wieler, L. H., Karch, H., Reeves, P.  
565 R., Maiden, M. C. J. & other authors. (2006). Sex and virulence in *Escherichia coli*: an  
566 evolutionary perspective. *Mol Microbiol* **60**, 1136–1151.
- 567 Zerbino, D. R. & Birney, E. (2008). Velvet: Algorithms for de novo short read assembly  
568 using de Bruijn graphs. *Genome Res* **18**, 821–829.
- 569  
570



571 **Figures and Tables**

572

573

**Table 1. Datasets used to assess accuracy and utility of the EcOH database**

| Isolates     | Citation                                                 | ENA or NCBI project number                  | N genomes | Population    | Sequencing Centre                 |
|--------------|----------------------------------------------------------|---------------------------------------------|-----------|---------------|-----------------------------------|
| EPEC         | Ingle <i>et al.</i> In press                             | ERP001141 (ENA)                             | 197       | Diverse       | Sanger, UK                        |
| ETEC         | (Mentzer <i>et al.</i> , 2014)                           | Various, see (Mentzer <i>et al.</i> , 2014) | 360       | Diverse       | Sanger, UK                        |
| UPEC         | (Petty <i>et al.</i> , 2014; Price <i>et al.</i> , 2013) | ERP001354 (ENA)<br>SRP027327 (NCBI)         | 169       | Clonal, ST131 | UQ, AUS<br>Arizona, USA           |
| Genome Trakr |                                                          | PRJNA183844 (NCBI)                          | 300       | Diverse       | Food and Drug Administration, USA |

574

575

576 **Figure Legends**

577

578 **Figure 1. Comparison of serotype calls in 197 EPEC isolates**

579 Venn diagrams showing the number of isolates yielding confident serotype calls for O-group  
580 or H-antigen by serological phenotyping vs. SRST2 analysis of reads (confident call at  $\geq 1$  O-  
581 antigen locus or at H locus; a-b), or vs. BLAST+ analysis of *de novo* assemblies (hit to  $\geq 1$  O-  
582 antigen locus or at H locus; c-d).

583

584 **Figure 2. Serotype and sequence type diversity amongst 197 EPEC isolates**

585 **(a)** Tree of EPEC isolates based on clustering of MLST allele profiles. Tips are labelled with  
586 sequence types. **(b)** Distribution of O-groups determined by SRST2 analysis using the EcOH  
587 database. The 12 most frequent O-groups are highlighted in colour with the less frequent O-  
588 groups shown in grey. **(c)** Distribution of H-types detected by SRST2 analysis using the  
589 EcOH database. The 10 most frequent H-types are highlighted in colour with the less  
590 frequent H-types shown in grey.

591

592 **Figure 3. Accumulation curves for O-groups and H-types amongst EPEC and ETEC**  
593 **isolates**

594 Accumulation of O-groups **(a, c)** or H-types **(b, d)** detected as more isolates in each lineage  
595 (ST) of EPEC (a, b) or ETEC (c, d) are sampled.

596

597 **Figure 4. *In silico* prediction of serotype and antimicrobial resistance for UPEC ST131**  
598 **isolates**

599 Core genome SNP tree for 170 isolates, outgroup-rooted using ST95 isolates. Serotype and  
600 acquired antimicrobial resistance gene profiles, detected using SRST2, are demarcated on  
601 the rings surrounding the phylogeny; note low-confidence serotype calls are shown in paler  
602 colours.

603

604 **Figure 5. *In silico* prediction of serotype and sequence type from GenomeTrakr data**

605 Kmer-based tree obtained from the GenomeTrakr project; common sequence types (STs) or  
606 clonal complexes (CC), identified by SRST2, are highlighted and labelled. Rings show  
607 predicted O-type (inner ring) and H-type (outer ring).

608

609

610

611

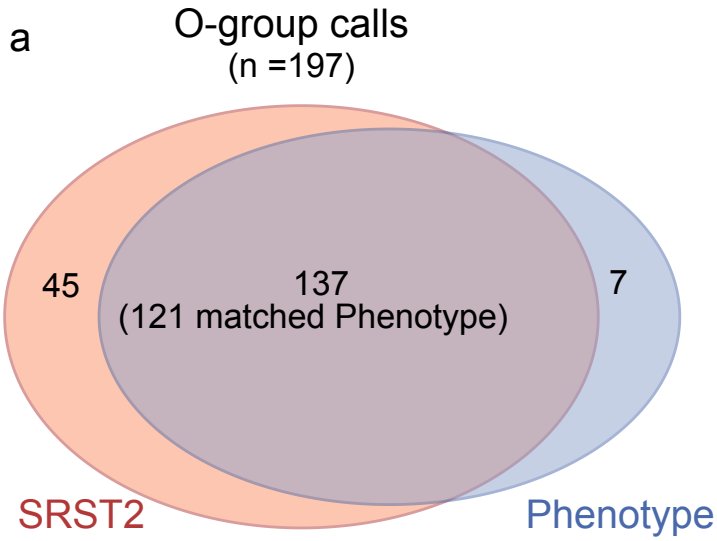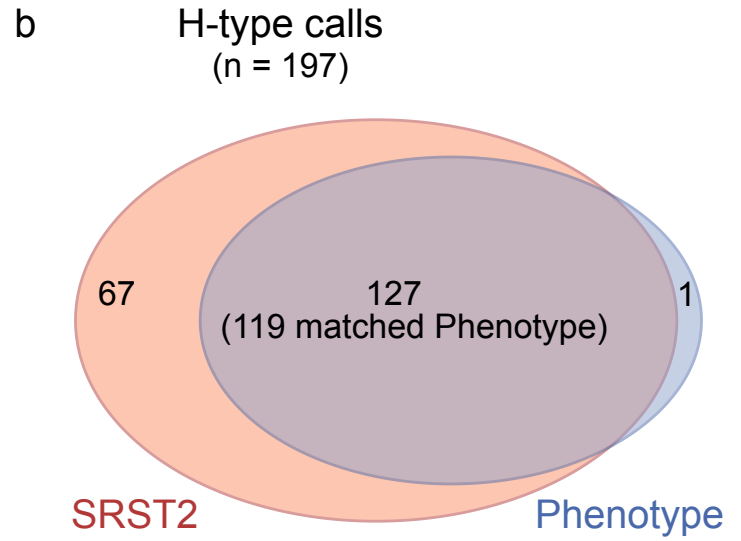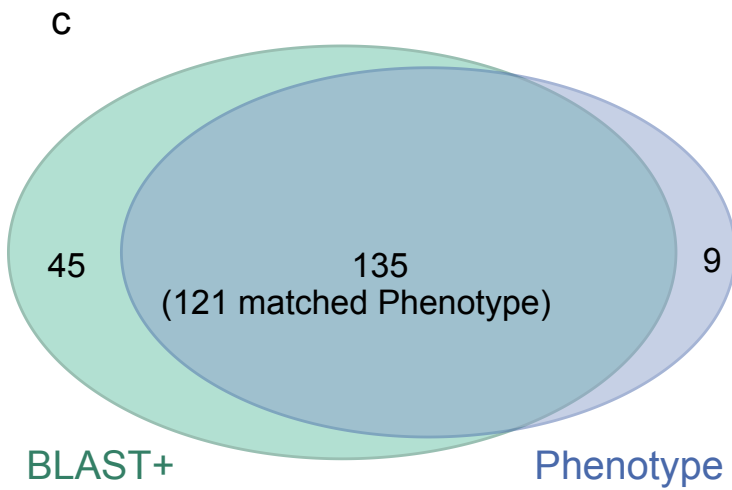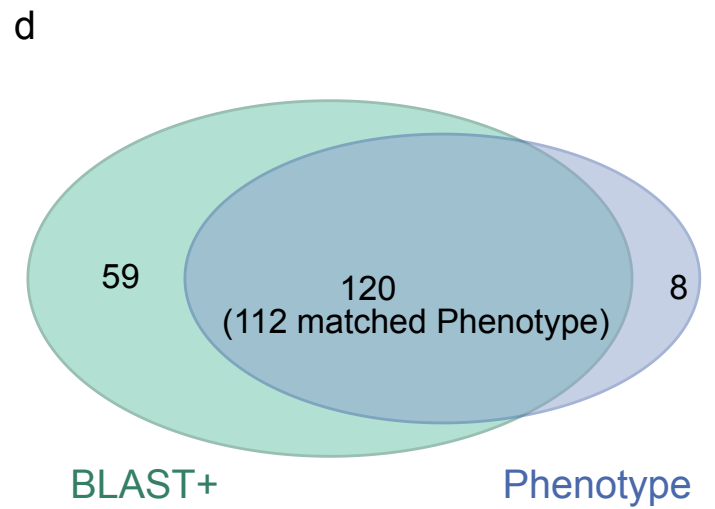

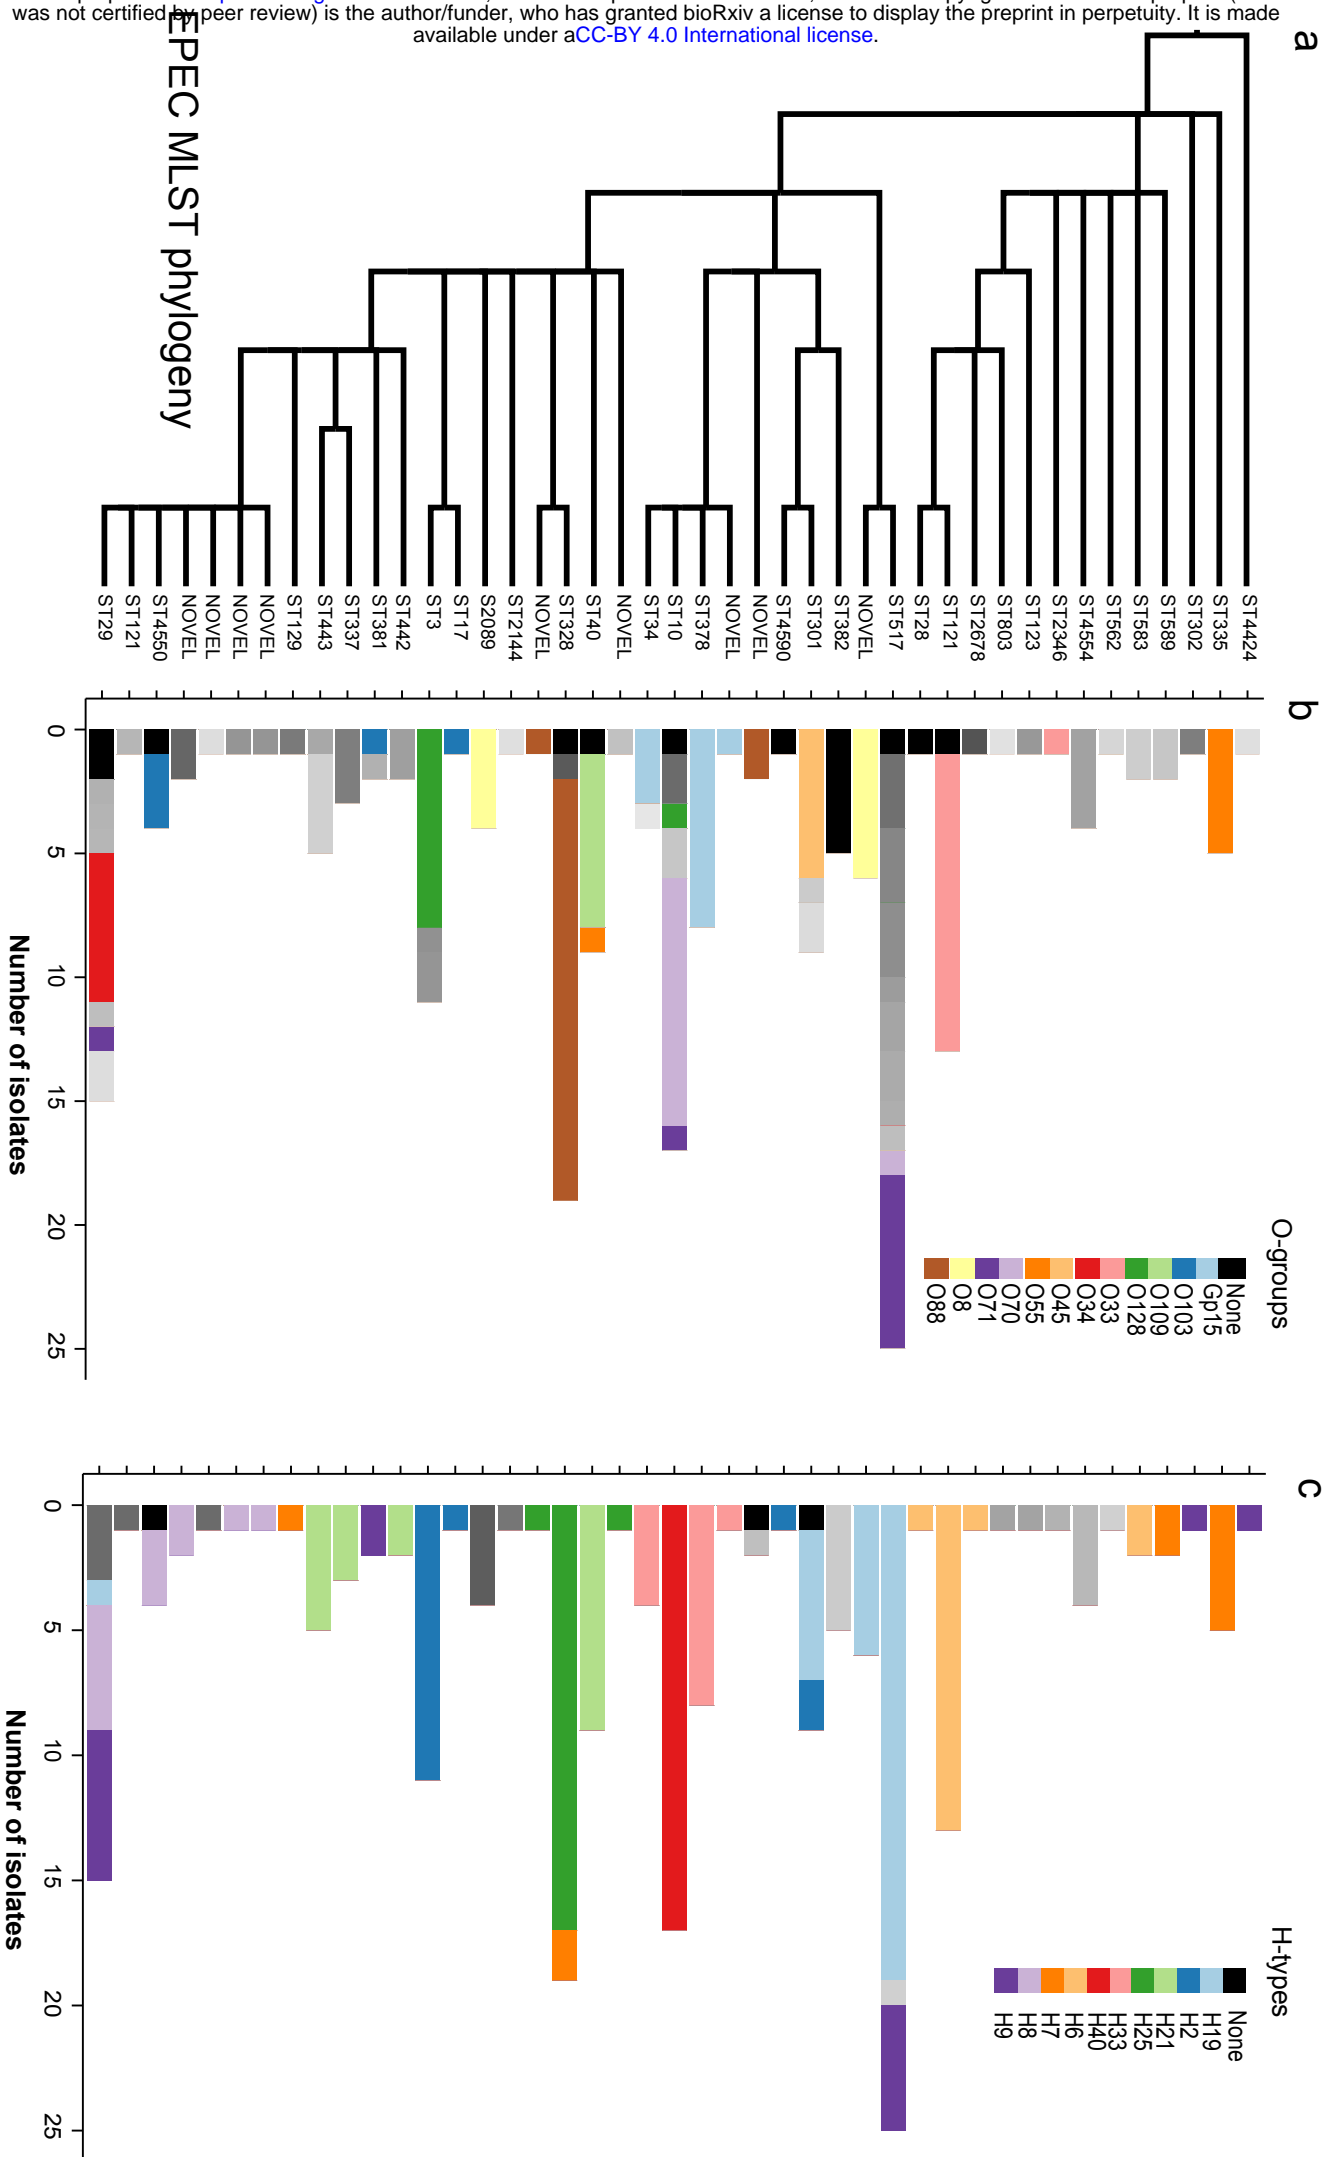

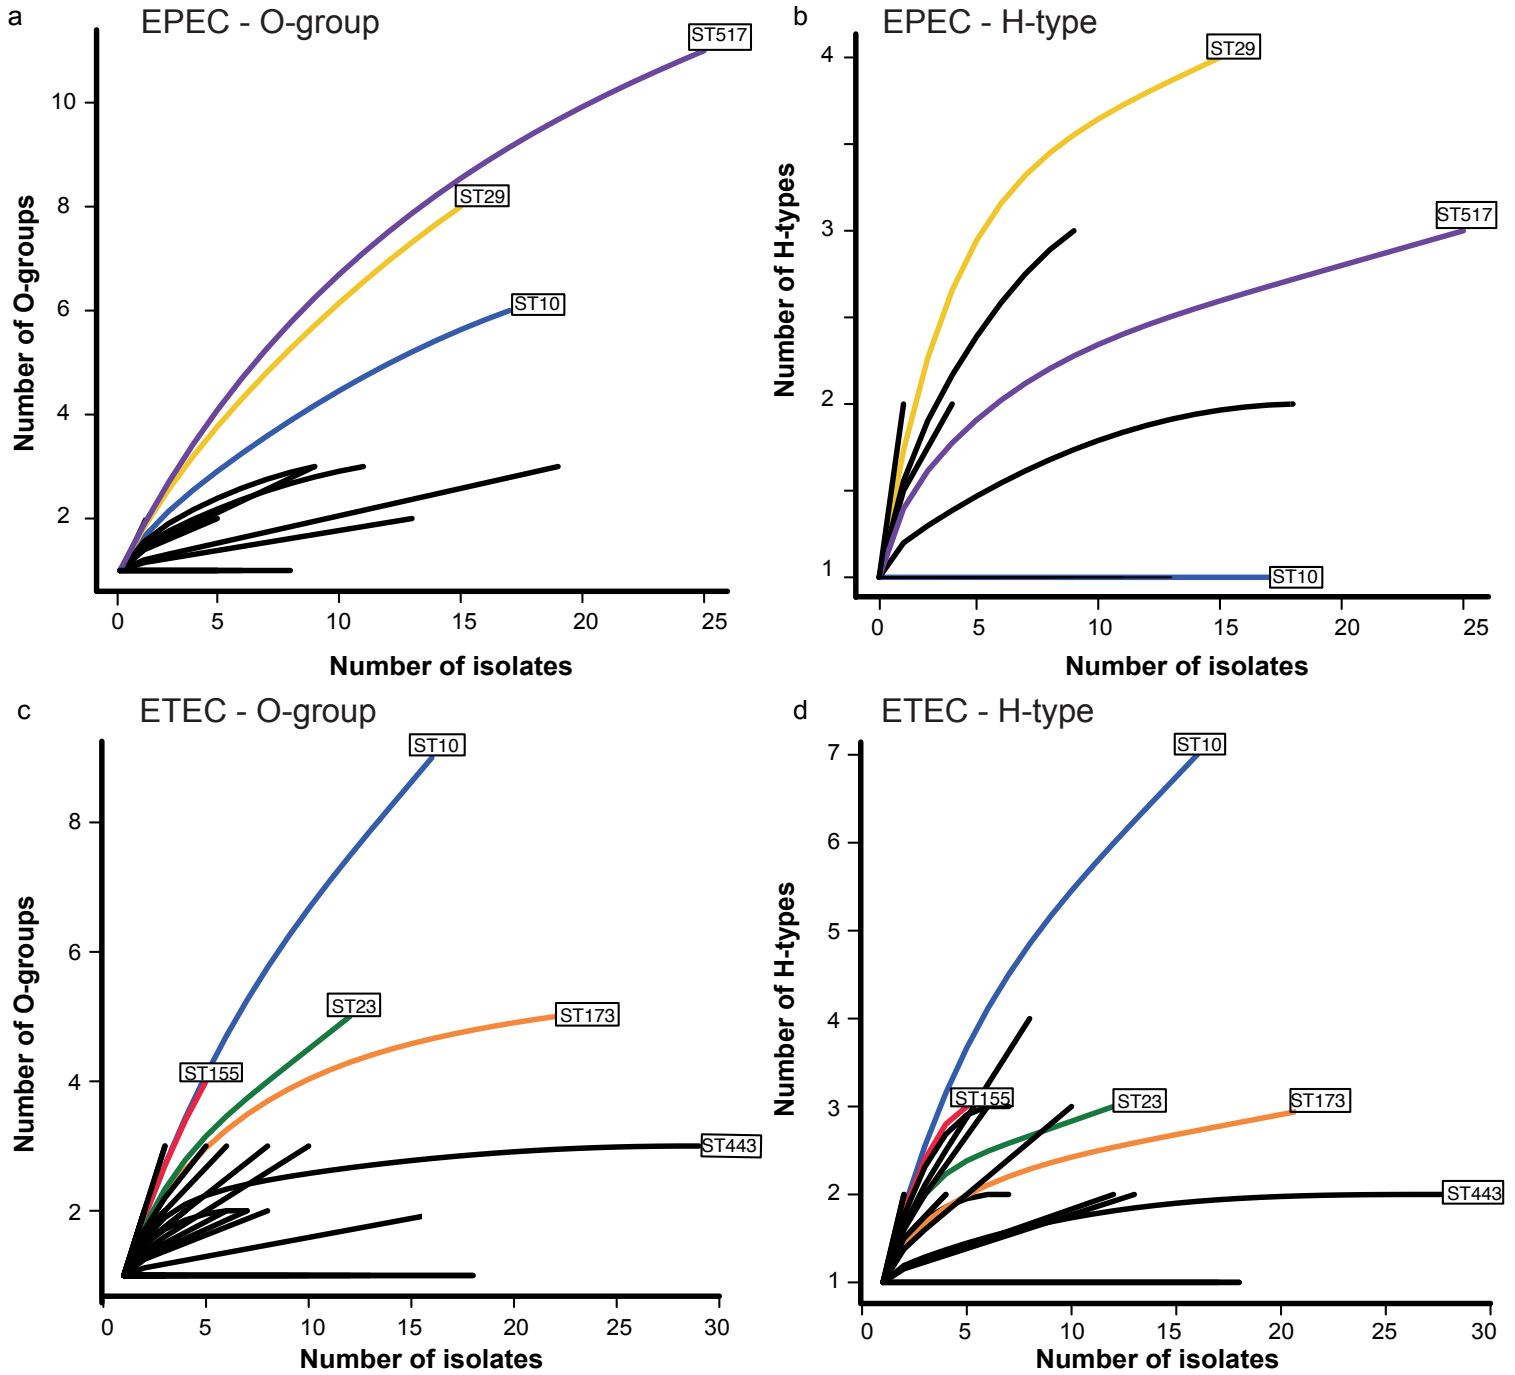

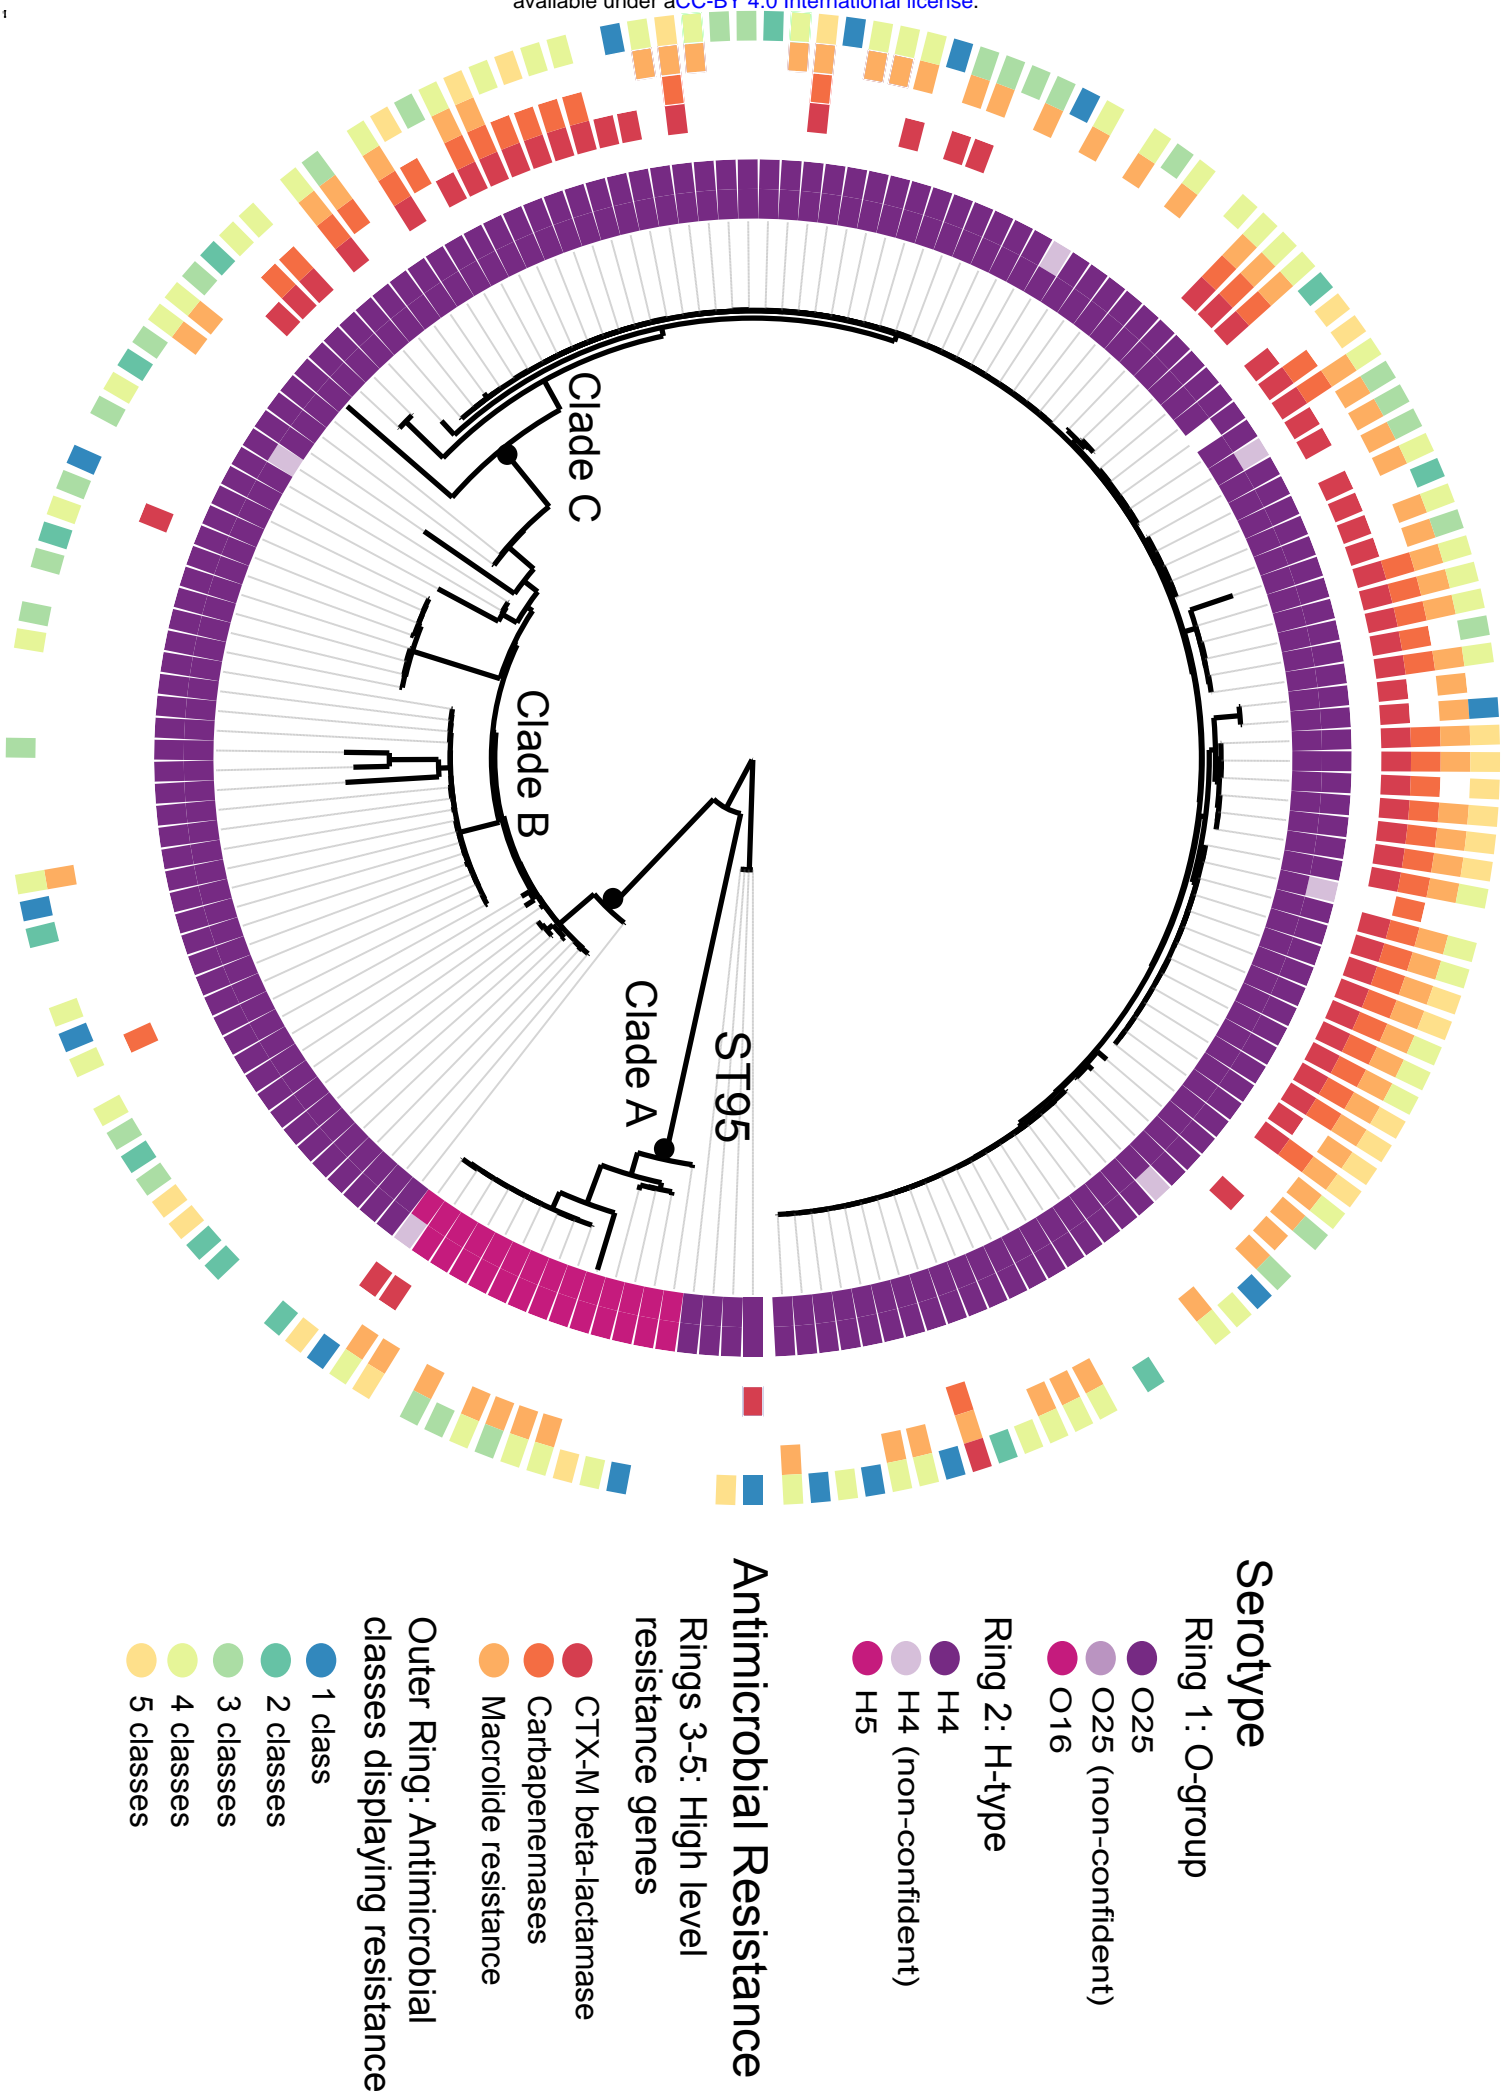



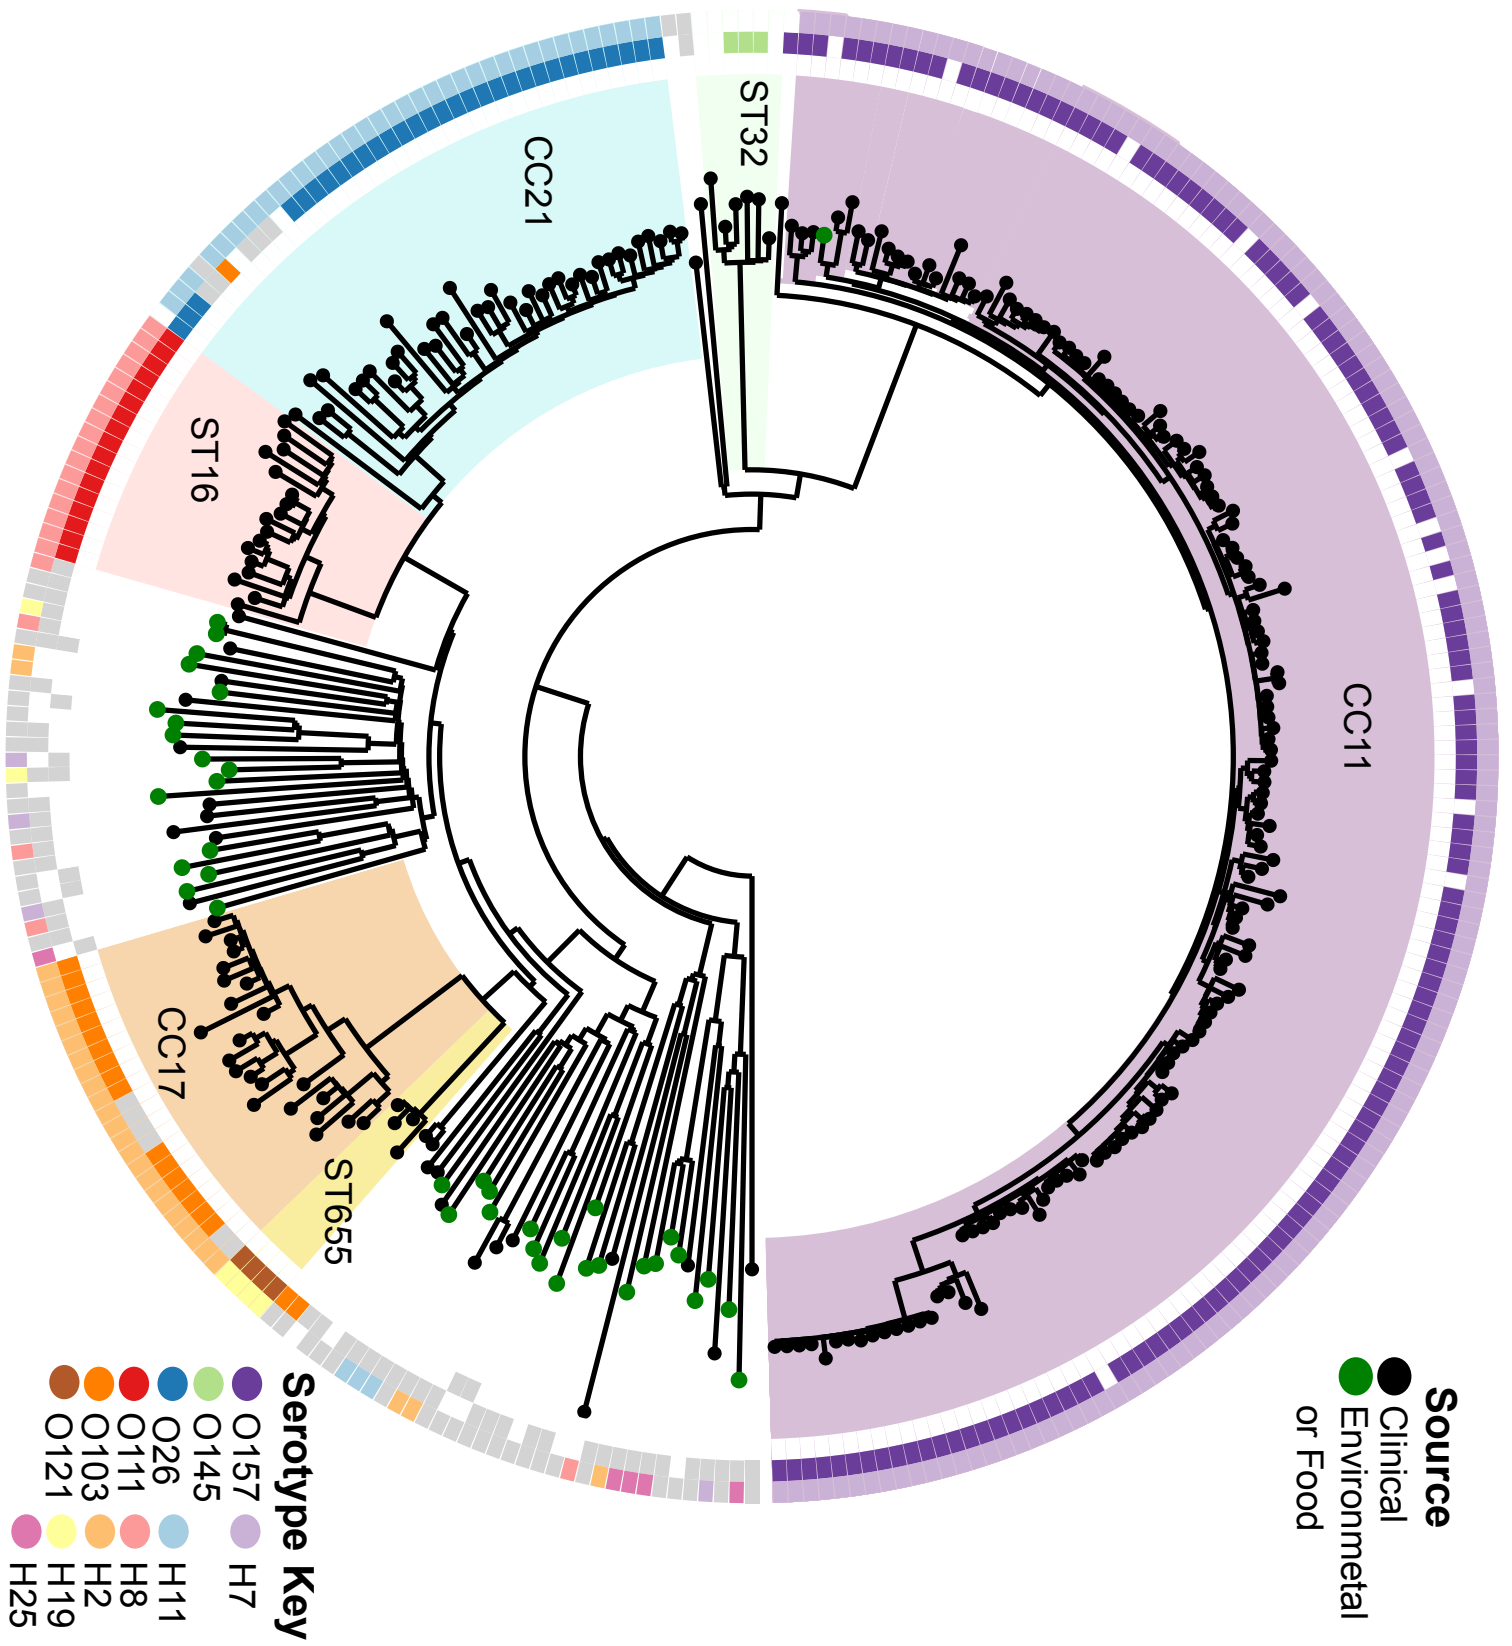

Source: https://www.biorxiv.org/content/10.1101/032151v1.full.pdf
